# Supplementary material
Source: PubMed Central journal article supplement (PMC8153366)
Supplement: NIHMS1568099-supplement-1.pdf [file NIHMS1568099-supplement-1.pdf]

## Supplemental information

**Table S1.** Query text used to calculate the impact and volume of different techniques frequently used in the study of chromatin structure and function for Figure 1.

| Technique                       | Search                                                                                                                                                                                                                                                                                                                                                                                      |
|---------------------------------|---------------------------------------------------------------------------------------------------------------------------------------------------------------------------------------------------------------------------------------------------------------------------------------------------------------------------------------------------------------------------------------------|
| Chromosome Conformation Capture | ("chromosome conformation" OR <sup>1</sup> "contact matri* <sup>2</sup> " OR "Hi-C" OR "3C technology" OR "heat map*" OR "chromosome interaction capture" OR "ChIA-PET" OR "Capture C" OR "Chip-loop" OR "4C technique" OR "Micro-C technique" OR "5C technique" OR "Dnase Hi-C") AND <sup>3</sup> (chromatin OR nucleosome*)                                                               |
| Crosslinking techniques         | (crosslinking OR EMANIC) AND (chromatin OR nucleosome*)                                                                                                                                                                                                                                                                                                                                     |
| Computational methods           | ("molecular modeling" OR "molecular modelling" OR "computational study" OR "molecular dynamics" OR "Monte Carlo simulations" OR "dynamics simulation") AND (chromatin OR nucleosome*)                                                                                                                                                                                                       |
| Super resolution microscopy     | ("structured illumination microscopy" OR "single molecule localization microscopy" OR "reversible structural optical fluorescence transition" OR "stochastic optical reconstruction microscopy" OR "photoactivation localization" OR "simulated emission depletion microscopy") AND (chromatin or nucleosome*)                                                                              |
| Light microscopy                | ("fluorescence recovery after photobleaching" OR "fluorescence anisotropy" OR "continuous photobleaching" OR "single particle tracking" OR "fluorescence correlation spectroscopy" OR "FRET" OR "fluorescence photoactivation" OR "fluorescence in situ hybridization" OR "fluorescence cross correlation spectroscopy" OR "fluorescence life time imaging") AND (chromatin OR nucleosome*) |
| Medium resolution methods       | ("small angle X-ray diffraction" OR "electron spectroscopic imaging" OR "SAXS" OR "Cryo-EM" OR "Cryo-electron microscopy" OR "atomic force microscopy" OR "transmission electron microscopy") AND (chromatin OR nucleosome*)                                                                                                                                                                |
| X-ray crystallography           | ("X-ray crystallography" OR "X ray crystallography") AND ((chromatin OR nucleosome*) W/3 <sup>4</sup> (structure OR function OR mechanisms OR dynamics))                                                                                                                                                                                                                                    |
| Nuclear Magnetic Resonance      | ("NMR" OR "Nuclear magnetic resonance") AND ((chromatin OR nucleosome*) W/3 (structure OR function OR mechanism OR dynamics))                                                                                                                                                                                                                                                               |

1. OR is a Boolean operator to specify that at least one of the terms must appear

2. The wildcard character (\*) is used to search for singular and plural of words

3. AND is a Boolean operator to specify that all the terms must appear

4. W/3 is a proximity operator that indicates distance between words, used here to specify that the word chromatin or nucleosome/nucleosomes must be within 3 words of any of the following words: structure, function, mechanism, or dynamics
